# Supplementary material for: Developmental Regulation of Transcription in Touriga Nacional Berries under Deficit Irrigation
Source: Plants (Basel). 2022 Mar 21;11(6):827. doi: 10.3390/plants11060827 (PMC8955924; doi:10.3390/plants11060827)
Supplement: Supplementary file 1 [file plants-11-00827-s001.zip › plants-1619755-Supplementary Tables.xlsx]

## Sheet: Table S1
Supplemental Table S1. Correlation with pre-dawn leaf water potential (Ψpd): Transcripts identified by correlation with water potential. A filter of R2 ≥ 0.99 was applied. Transcript ID, r, Functional Category and annotation (according CRIBI/TAIR). Minus signal (-) in r column indicates a negative correlation and plus signal (+) indicates a positive correlation.
Transcript ID	r	Gene Functional Category	TAIR/CRIBI
VIT_200s0262g00090.1	-	Signaling	Cysteine-rich Receptor-like Protein Kinase
VIT_200s0264g00040.4	+	Metabolism	Oxygenase Superfamily Protein
VIT_200s0357g00100.1	+	Unknown	Extensin family protein
VIT_201s0011g05470.1	-	No Name	PCR2 -Protein Plant Cadmium Resistance 2-like
VIT_201s0011g05790.1	+	Cellular process	Microtubule-Associated Proteins
VIT_201s0026g02340.1	+	Diverse functions	Methyltransferases Superfamily Protein
VIT_202s0025g01200.2	+	No Name	TBL23
VIT_202s0025g03210.1	+	Unknown	TMPIT
VIT_202s0025g04280.1	-	No Name	Gypsy-like Retrotransposon Family
VIT_202s0241g00030.1	+	No Name	ATSMO1-1
VIT_203s0063g00370.1	+	Metabolism	Nitrite Reductase
VIT_204s0008g01720.1	+	Transport overview	ATMSL10
VIT_204s0008g06640.1	+	Cellular process	EMP1
VIT_204s0023g02690.1	+	Metabolism	BGAL3
VIT_204s0043g00330.1	+	Unknown	Gypsy-like Retrotransposon Family
VIT_205s0020g00440.1	+	Transport overview	BOR2
VIT_205s0020g02690.1	+	Unclear	Heavy Metal Transport/Detoxification Superfamily Protein
VIT_205s0094g00530.1	-	Signaling	IQ-DOMAIN 14
VIT_206s0004g03240.1	+	Metabolism	Elongation Factor
VIT_206s0004g07770.1	+	Metabolism	Peroxidase 52
VIT_207s0005g02710.1	-	Unknown	Threonine-Kinase
VIT_207s0031g00060.1	+	Metabolism	Probable Beta-Xylosyltransferase
VIT_207s0031g00540.1	+	Signaling	RALFL34
VIT_208s0007g02470.1	+	Metabolism	Aspartic Proteinase Nepenthesin-2-like
VIT_208s0007g06040.1	-	Metabolism	Beta-Glucanase
VIT_208s0040g00380.4	+	Regulation overview	Probable s-Acyltransferase
VIT_209s0002g02300.1	+	Regulation overview	Zinc finger protein
VIT_209s0002g05730.1	-	Unclear	ATMAGL3
VIT_209s0002g08270.1	-	Diverse functions	F-box LRR-Repeat Protein
VIT_209s0018g01490.2	-	Metabolism	Benzyl Alcohol O-Benzoyltransferase
VIT_209s0070g00480.1	+	Cellular process	Extensin-like Protein
VIT_209s0070g00490.2	+	Signaling	Protein Phosphatase 2c
VIT_210s0003g05320.1	+	Cellular process	TUB8
VIT_211s0016g00710.1	-	Signaling	Protein Tify 10a
VIT_211s0149g00030.1	+	Cellular process	Transmembrane 9 superfamily member 4-like
VIT_212s0028g00670.1	-	No Name	PIRL9
VIT_212s0028g02540.1	+	Metabolism	Glucan Endo-1 3-Beta-Glucosidase
VIT_213s0019g02810.1	-	Metabolism	UDP-Glycosyltransferase
VIT_213s0019g04460.1	-	Metabolism	Phenylalanine Ammonia-lyase
VIT_213s0019g04620.1	-	Metabolism	Cysteine-type Peptidase
VIT_213s0067g01150.1	+	Unknown	2-Oxoglutarate-dependent Dioxygenase
VIT_213s0067g02220.1	+	Transport overview	Sodium-coupled Neutral Amino Acid Transporter
VIT_213s0156g00110.1	+	Metabolism	aaa-type ATPase Family Protein
VIT_213s0156g00610.1	+	Signaling	g-type Lectin s-Receptor-like Serine Threonine-protein Kinase
VIT_214s0066g01050.1	+	Cellular process	Shaggy-related Protein Kinase Epsilon
VIT_214s0083g00690.3	+	Metabolism	Glycosyltransferase
VIT_214s0128g00780.1	-	Metabolism	Lipoxygenase
VIT_215s0046g02020.1	+	Unknown	Encodes a protein with no functionally characterized domains
VIT_215s0046g02300.2	-	Metabolism	Beta-Cyanoalanine Synthase Cysteine Synthase
VIT_216s0039g01810.1	-	Regulation overview	n-Acetyltransferase Family Protein
VIT_216s0098g01170.1	-	Regulation overview	homeobox-Leucine Zipper Protein
VIT_219s0015g00690.3	+	Unclear	NOI protein
VIT_219s0090g01650.1	+	Signaling	TRN1

## Sheet: Table S2
Supplemental Table S2. Top ten up- and down-regulated DEGs in véraison and maturation samples. Empty Gene Name indicates that no name was found on CRIBI/TAIR.
	Transcript ID	Ratio	RPKM RDI	RPKM SDI	Gene Name	Gene Functional Category	Description
up-regulated DEGs: Maturation	VIT_201s0127g00840.1	8	8	0		Metabolism	hypothetical protein; Nucleic acid-binding OB-fold
	VIT_202s0109g00230.5	8	8	0		Response to stimulus	early-responsive to dehydration stress protein; uncharacterized protein rsn1-like
	VIT_200s0873g00020.1	7	54	7		Metabolism	NADH dehydrogenase subunit 3
	VIT_200s0873g00010.1	7	243	33		Metabolism	ribosomal protein s12
	VIT_219s0027g00465.1	7	7	0		No Name	DNA-dependent rna polymerase
	VIT_200s0396g00050.1	7	14	2		Metabolism	ribosomal protein s4
	VIT_207s0129g00590.4	7	7	0		Unknown	u-box domain-containing protein 4-like
	VIT_203s0110g00200.1	6	7	1		Metabolism	apocytochrome b
	VIT_208s0007g05930.1	6	8	1	LIS	Metabolism	u4 u6 small nuclear ribonucleoprotein prp4-like
	VIT_201s0146g00390.1	6	20	3		Metabolism	ATPase subunit 8
down-regulated DEGs: Maturation	VIT_212s0035g01910.1	-103	0	103	HSP22	Metabolism	class iv heat shock protein
	VIT_206s0080g00540.4	-15	0	15		Unknown	f1f0-atpase inhibitor protein
	VIT_218s0089g01270.1	-13	2	21	HSP22	Metabolism	HSP22
	VIT_213s0074g00720.1	-10	0	10	INV-E	Metabolism	alkaline neutral invertase
	VIT_201s0011g02200.1	-9	0	9	GSR	Metabolism	glutamine synthetase
	VIT_200s1603g00010.1	-8	0	8	RAB1A	Cellular process	ras-related protein ric1
	VIT_205s0094g00120.1	-8	0	8	NRPB8A	Metabolism	DNA-directed RNA polymerases and iii kDa polypeptide
	VIT_215s0046g03340.1	-7	0	7	CAC3	Metabolism	acetyl-coenzyme a carboxylase carboxyl transferase subunit alpha
	VIT_209s0002g01480.1	-6	0	6	TRFL6	Regulation overview	myb family transcription factor
	VIT_216s0050g02660.3	-6	0	6		Metabolism	pyruvate kinase
up-regulated DEGs: Véraison	VIT_201s0011g02200.1	17	17	1	GSR	Metabolism	glutamine synthetase
	VIT_215s0046g01590.2	10	68	7	CHIA	Metabolism	hypothetical protein; Glycoside hydrolase catalytic domain; Glycoside hydrolase chitinase active site
	VIT_201s0010g01200.1	9	9	1	DWF1	Metabolism	cell elongation protein diminuto
	VIT_215s0046g01610.1	7	16	2	CHIA	Metabolism	acidic endochitinase-like
	VIT_207s0129g00180.2	7	7	1	ACA2	Signaling	Ca2+-transporting ATPase; calcium-transporting atpase plasma membrane-type
	VIT_206s0080g00540.4	7	7	1		Unknown	f1f0-atpase inhibitor protein
	VIT_214s0066g02350.1	7	14	2	LGT8	Metabolism	probable galacturonosyltransferase-9 like
	VIT_215s0048g02270.9	7	7	1	NTL9	Regulation overview	NAC transcription factor-like 9
	VIT_201s0011g06050.2	6	6	1		Unknown	protein vip1; protein vip1-like
	VIT_208s0007g00530.5	6	6	1		Metabolism	NAD-dependent epimerase dehydratase
down-regulated DEGs: Véraison	VIT_210s0003g04880.1	-14	1	14	RFNR2	Metabolism	ferredoxin-NADP+ reductase
	VIT_202s0109g00230.2	-11	2	17		Response to stimulus	early-responsive to dehydration stress protein; uncharacterized protein rsn1-like
	VIT_200s0490g00010.1	-8	1	8		No Name	hypothetical protein
	VIT_205s0094g00120.1	-7	1	7	NRPB8A	Metabolism	DNA-directed RNA polymerases and iii kDa polypeptide
	VIT_203s0063g02000.5	-6	1	6	ARI1	Unknown	e3 ubiquitin-protein ligase ari1
	VIT_214s0060g02280.4	-6	1	6		Regulation overview	DNA binding
	VIT_201s0146g00060.3	-5	1	5	G6PD2	Metabolism	glucose-6-phosphate dehydrogenase 2
	VIT_203s0038g03570.2	-5	1	6	SKS5	Transport overview	L-ascorbate oxidase homolog
	VIT_206s0004g04730.1	-5	1	5	CXIP4	Metabolism	cax-interacting protein 4
	VIT_217s0000g05360.1	-5	4	18	GLP4	Metabolism	rhicadhesin receptor

## Sheet: Table S3
Supplemental Table S3. List of Primers utilized in RT-qPCR.
NCBI Reference	Annotation and abbreviation	Forward Primer	Reverse Primer	bp
XM_002267889	Small heat shock protein 26.5 kDa, mitochondrial (HSP26.5)	5' AGGGCAGAGGAGACGAGAC 3'	5' ATCAGTCGGAGTCCATGTATCG 3'	109
XM_002272382	Small heat shock protein, chloroplastic HSP20 family (HSP20)	5' CCTCTGGCAACCCACAAAC 3'	5' GGTCCATTGCGTCCATCAT 3'	292
XM_002270560	Small heat shock protein 23.6 kDa, mitochondrial (HSP23.6)	5' CCGCCTCCTCTCCTCTCC 3'	5' TCTTCGCCATCATCGTAGTCG 3'	109
XM_002280785	Class I heat shock protein,18.2 kDa (HSP18.2A)	5' GAAGGAGGAAGTGAAGGTTGAG 3'	5' ACACCGTTCTCCATAGTAGCCT 3'	192
XM_002263340	Heat shock protein 22.0 kDa (HSP22)	5' GAGGTGAAGATAGAGGTGGACG 3'	5' GAGCACCCCATTCTCAAGC 3'	192
XM_002280644	Class II heat shock protein 17.9 kDa (HSP17.9A)	5' CGTCAAGGAGTACCCCAATTC 3'	5' AACTTCCCCACCCTCCTCT 3'	177
XM_002281249	Class I heat shock protein 18.2 kDa (HSP18.2B)	5' CCGTTCCAAGACTTCCCATT 3'	5' CTCCCTTCCTCAACCTCTACCT 3'	170
XM_002280449	Class II heat shock protein 17.9 kDa (HSP17.9B)	5' TTCCTACGCCTTCATCATCG 3'	5' ACACGCCATCTTGACAAACC 3'	230
XM_002281224	Class I heat shock protein 18.2 kDa (HSP18.2C)	5' CCATTCCAGGACTTCCCATT 3'	5' CTCGGTGCCACTTGTCATTC 3'	235
XM_002284731	Ascorbate peroxidase (APX1), cytosol	5’ GCCCCACCATTGACTTTGTACC 3’	5’ ATCGCTCTGGATGTGCCCTTC 3’	218
XM_002273696	Early-responsive to dehydration stress protein	5’ TGGCAAAGGACACAATGGAACG 3’	5’ AATGAGGTGGAGGCTGGACTTC 3’	228
TCONS_00066078	Calmodulin-regulated Ca(2+)-pump (CRP)	5’ TGGAGAGGTTGGCAGTGAAGC 3’	5’ ATGAGGGAGGAGTGTGGTTGTG 3’	204
XM_002279506	RING/U-box domain-containing protein (RINGU)	5’ TCCCTCTACCCAAGCCCTTCC 3’	5’ ACCTTCACCATCGCCGTCATC 3’	246
XM_019225860	Cytochrome p450 89a2-like (P450)	5’ GCCTCCTCCGCCGCAATC 3’	5’ TCGCCGAAGCACATGAGAACC 3’	199
XM_002281660	Auxin-induced protein 22D (AUX22)	5’ CTCCCAGCATTCTCATCACAGC 3’	5’ CGTCGTCGTCGGCATCGG 3’	286
XM_002263925	Gibberellin 2-beta-dioxygenase 1 (2ßDIOX)	5’ AGACCTCTCACAACCTGACTCC 3’	5’ GACCAATATCGCCGCTTGATCC 3’	224
XM_002270545	Ethylene responsive element binding factor 1 (EREB)	5' CACGCTCGCTCCACTCTTT 3'	5' CCCTGTAATGCTTCCCCTTC 3'	185
XM_003633976	Ethylene-responsive transcription factor ERF105 (ERF105B)	5' CTTTTCTCCTCCACTGTTCTACCT 3'	5' ATGTCCCCAGCCATACCCT 3'	264
XM_002281777	Ethylene-responsive transcription factor ERF105(ERF105A)	5' TAAGTCATCGGCGACCTCC 3'	5' ATGTCCCCAGCCATACCCT 3'	183
XM_002280007	Ethylene-responsive transcription factor ERF025-like (ERF025-like)	5' CTCCTCAACGCCCACATCT 3'	5' GGTACGTGCCGAGCCATAT 3'	179
XM_002282403	Translation initiation factor eIF-3 subunit 4 (TIF)	5' AAAGCAGAAGAAACCAAGATT 3'	5' TTGCCAGTGCCTGTAGTAGCC 3'	206
XM_002271296	Translation initiation factor eIF-2B alpha subunit (TIF-GTP)	5' AGCAGCACAGAATAAGAAACT 3'	5' CCATCAGCCCCAACAAATACC 3'	177
AF369525.1	Actin 2 (act)	5´ TGGATTCTGATGGTGTGAGTC 3'	5' CAATTTCCCGTTCAGCAGTAGTGG 3'	167
